# Supplementary material for: Exosome-based detection of activating and resistance EGFR mutations from plasma of non-small cell lung cancer patients
Source: PubMed Central journal article supplement (PMC6499599; doi:10.18632/oncotarget.26885), 2019-04-23
Supplement: oncotarget-10-2911-s001.pdf [file oncotarget-10-2911-s001.pdf]

## Exosome-based detection of activating and resistance EGFR mutations from plasma of non-small cell lung cancer patients

### SUPPLEMENTARY MATERIALS

Supplementary Table 1: Mutant admixtures

| T790M             |                            | L858R             |                            | exon 19 indels    |                            | Mutation detected |
|-------------------|----------------------------|-------------------|----------------------------|-------------------|----------------------------|-------------------|
| Allelic frequency | Mutant copies <sup>*</sup> | Allelic frequency | Mutant copies <sup>*</sup> | Allelic frequency | Mutant copies <sup>*</sup> |                   |
| 0% (Wild type)    | 0                          | 0% (Wild type)    | 0                          | 0% (Wild type)    | 0                          | No                |
| 0% (Wild type)    | 0                          | 0% (Wild type)    | 0                          | 0% (Wild type)    | 0                          | No                |
| 0% (Wild type)    | 0                          | 0% (Wild type)    | 0                          | 0% (Wild type)    | 0                          | No                |
| 0% (Wild type)    | 0                          | 0% (Wild type)    | 0                          | 0% (Wild type)    | 0                          | No                |
| 0% (Wild type)    | 0                          | 0% (Wild type)    | 0                          | 0% (Wild type)    | 0                          | No                |
| 0% (Wild type)    | 0                          | 0% (Wild type)    | 0                          | 0% (Wild type)    | 0                          | No                |
| 0.17%             |                            | 0.17%             |                            | 0.17%             |                            | Yes               |
| 0.17%             |                            | 0.17%             |                            | 0.17%             |                            | Yes               |
| 0.17%             |                            | 0.17%             |                            | 0.17%             |                            | Yes               |
| 0.17%             |                            | 0.17%             |                            | 0.17%             |                            | Yes               |
| 0.17%             |                            | 0.17%             |                            | 0.17%             |                            | Yes               |
| 0.17%             |                            | 0.17%             |                            | 0.17%             |                            | Yes               |
| 0.28%             |                            | 0.28%             |                            | 0.28%             |                            | Yes               |
| 0.28%             |                            | 0.28%             |                            | 0.28%             |                            | Yes               |
| 0.28%             |                            | 0.28%             |                            | 0.28%             |                            | Yes               |
| 0.28%             |                            | 0.28%             |                            | 0.28%             |                            | Yes               |
| 0.28%             |                            | 0.28%             |                            | 0.28%             |                            | Yes               |
| 0.28%             |                            | 0.28%             |                            | 0.28%             |                            | Yes               |
| 0.51%             |                            | 0.51%             |                            | 0.51%             |                            | Yes               |
| 0.51%             |                            | 0.51%             |                            | 0.51%             |                            | Yes               |
| 0.51%             | 26.1 ± 5.6                 | 0.51%             | 31.5 ± 2.8                 | 0.51%             | 32.5 ± 7.4                 | Yes               |
| 0.51%             |                            | 0.51%             |                            | 0.51%             |                            | Yes               |
| 0.51%             |                            | 0.51%             |                            | 0.51%             |                            | Yes               |
| 0.51%             |                            | 0.51%             |                            | 0.51%             |                            | Yes               |
| 0.84%             |                            | 0.84%             |                            | 0.84%             |                            | Yes               |
| 0.84%             |                            | 0.84%             |                            | 0.84%             |                            | Yes               |
| 0.84%             |                            | 0.84%             |                            | 0.84%             |                            | Yes               |
| 0.84%             |                            | 0.84%             |                            | 0.84%             |                            | Yes               |
| 0.84%             |                            | 0.84%             |                            | 0.84%             |                            | Yes               |
| 0.84%             |                            | 0.84%             |                            | 0.84%             |                            | Yes               |
| 1.13%             |                            | 1.12%             |                            | 1.12%             |                            | Yes               |
| 1.13%             |                            | 1.12%             |                            | 1.12%             |                            | Yes               |
| 1.13%             |                            | 1.12%             |                            | 1.12%             |                            | Yes               |
| 1.13%             |                            | 1.12%             |                            | 1.12%             |                            | Yes               |
| 1.13%             |                            | 1.12%             |                            | 1.12%             |                            | Yes               |
| 1.13%             |                            | 1.12%             |                            | 1.12%             |                            | Yes               |

\*Average mutant copies measured by ddPCR. Average of six technical replicates.

**Supplementary Table 2: Droplet digital PCR validation of the sample input for the allelic frequency experiments**

| Sample*         | Copies Per 20 uL Well | Average** | Stdev | Sample*         | Copies Per 20uL Well | Average** | Stdev | Sample*                                        | Copies Per 20uL Well | Average** | Stdev |
|-----------------|-----------------------|-----------|-------|-----------------|----------------------|-----------|-------|------------------------------------------------|----------------------|-----------|-------|
|                 | 24.00                 |           |       |                 | 32.00                |           |       |                                                | 19.40                |           |       |
|                 | 25.00                 |           |       |                 | 31.80                |           |       |                                                | 28.40                |           |       |
| 25 copies T790M | 23.80                 | 26.30     | 5.57  | 25 copies L858R | 28.00                | 31.47     | 2.84  | 25 copies exon 19 deletion ( $\Delta$ 746-750) | 44.00                | 32.53     | 7.45  |
|                 | 18.80                 |           |       |                 | 35.00                |           |       |                                                | 34.80                |           |       |
|                 | 29.60                 |           |       |                 | 27.60                |           |       |                                                | 33.80                |           |       |
|                 | 36.60                 |           |       |                 | 34.40                |           |       |                                                | 34.80                |           |       |

\*Estimated copies based on Optical Density (OD) measurements from commercial vendor; \*\*Average of six technical ddPCR replicates.

**Supplementary Table 3: Samples that have one or more false negative classification in plasma as compared with tumor**

| Patient no. | Tissue status |          |                | ExoNA results from plasma        | M status |
|-------------|---------------|----------|----------------|----------------------------------|----------|
|             | T790M         | L858R    | exon 19 indels |                                  |          |
| 57          | Positive      | Negative | Positive       | Negative for all                 | M1a      |
| 61          | Positive      | Negative | Positive       | Negative for all                 | M0       |
| 62          | Positive      | Negative | Positive       | Positive for T790M only          | M1b      |
| 66          | Positive      | Negative | Positive       | Positive for exon 19 indels only | M1b      |
| 68          | Positive      | Negative | Positive       | Negative for all                 | M1a      |
| 72          | Positive      | Positive | Negative       | Negative for all                 | M1a      |
| 73          | Positive      | Negative | Positive       | Negative for all                 | M1a      |
| 75          | Positive      | Negative | Positive       | Negative for all                 | M1a      |
| 83          | Positive      | Negative | Positive       | Positive for exon19 indels only  | M0       |
| 85          | Positive      | Positive | Negative       | Negative for all                 | M1b      |
| 92          | Positive      | Negative | Positive       | Positive for T790M only          | M0       |
| 97          | Positive      | Positive | Negative       | Positive for L858R only          | M0       |
| 99          | Positive      | Negative | Positive       | Positive for T790M only          | M1b      |
| 100         | Positive      | Negative | Positive       | Positive for T790M only          | M1b      |
| 104         | Positive      | Negative | Positive       | Positive for T790M only          | M1b      |

**Supplementary Table 4: Synthetic constructs spike-ins used in the study**

| Target                               | Sequence                                                                                                                                                                                                                                                                                                                                                                                                                                             |
|--------------------------------------|------------------------------------------------------------------------------------------------------------------------------------------------------------------------------------------------------------------------------------------------------------------------------------------------------------------------------------------------------------------------------------------------------------------------------------------------------|
| T790M                                | ccctccctccagGAAGCCTACGTGATGGCCAGCGTGGACAACCCCCACGTGTGCCGCT<br>GCTGGGCATCTGCCTCACCTCCACCGTGCAGCTCATCATGCAGCTCATGCCCTTCG<br>GCTGCCTCCTGGACTATGTCCGGGAACACAAAGACAATATTGGCTCCCAGTACCT<br>GCTCAACTGGTGTGTGCAGATCGAAAAGtaAtcagggaggagatacggggaggaggataagga<br>gccaggatcctcac                                                                                                                                                                               |
| L858R                                | ctcacagcagggtcttctctgtttcagGGCATGAACTACTTGGAGGACCGTCGCTTGGTGCACCGC<br>GACCTGGCAGCCAGGAACGTACTGGTGAAAACACCGCAGCATGTCAAGATCACA<br>GATTTTGGGCGGGCCAAACTGCTGGGTGCGGAAGAGAAAGAATACCATGCAGAA<br>GGAGGCAAAgtaaggaggtggctttaggtcagccagcattttctgacaccagggaccaggctgcctcccactagctgtatt<br>gtttaacacatgcagggaggatgctctccagacattctgggt                                                                                                                            |
| exon 19 deletion ( $\Delta$ 746-750) | Tgctggctccacagccccagtgctcctcaccttcgggggtgcatcgctgtaaacatccaccagatcactgggcagcatgtggcaccat<br>ctcacaattgccagtaacgtcttctctctctctgcatagGGACTCTGGATCCCAGAAGGTGAGAAAAGTT<br>AAAATTCCCGTCGCTATCAAAAACATCTCCGAAAGCCAACAAGGAAATCCTCGATgt<br>gagtttctgcttctgtgtgggggtccatggctctgaacctcagccaccctttctcatgtctggcagctgctctgcttagacctgct<br>catctccacatcctaaatgttcaactttctatgtcttcccttctagctctagtggtataactcccctcccttagagacagcactggcctctc<br>ccatgctggtatccaccccaaaa |

**Supplementary Table 5: Droplet digital PCR conditions used to measure the synthetic constructs. (A) Mastermix composition. (B) PCR cycling conditions**

**A**

| Reagent                          | Final Concentration                    |
|----------------------------------|----------------------------------------|
| 2x Supermix for probes (no dUTP) | 1x                                     |
| 20x gene specific ddPCR assay    | 900 nM primers/250 nM probe            |
| Template                         | 1 $\mu$ l                              |
| Water                            | Adjust to a final volume of 20 $\mu$ l |
| Final reaction volume            | 20 $\mu$ l                             |

**B**

| Temperature, °C | Time     | Ramp Rate | Number of Cycles |
|-----------------|----------|-----------|------------------|
| 95              | 10 min   |           | 1                |
| 94              | 30 secs  | 2°C/sec   | 40               |
| 55              | 1 min    |           |                  |
| 98              | 10 min   |           | 1                |
| 4               | Infinite | 1°C/sec   | 1                |

**Supplementary Table 6: Clinical characteristics of patients included in the study. See Supplementary\_Table\_6**

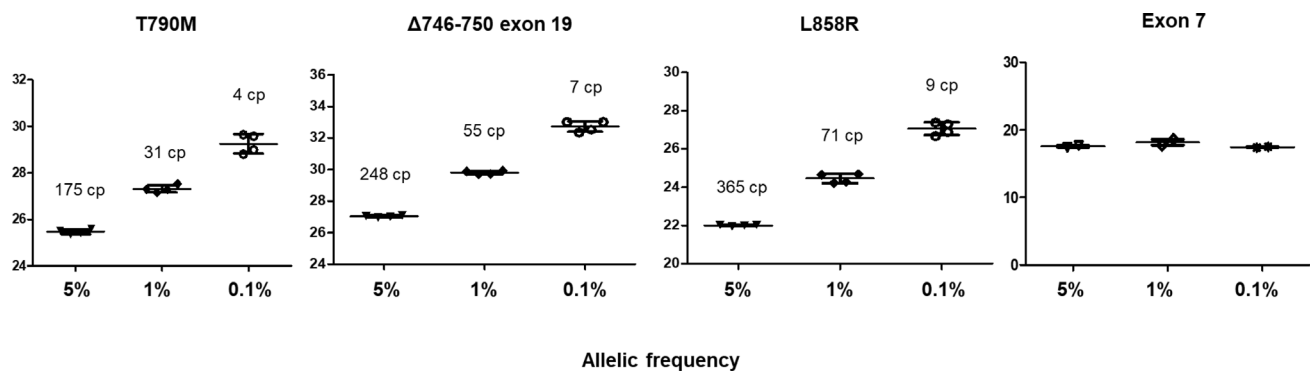

Supplementary Figure 1: Evaluation of assay performance on commercial admixture standards.

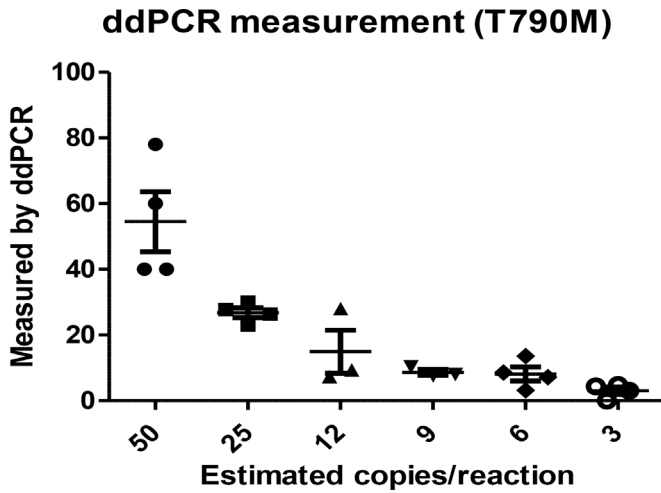

| Estimated | Measured $\pm$ Stdev |
|-----------|----------------------|
| 50 copies | 54 $\pm$ 17.4        |
| 25 copies | 26.8 $\pm$ 2.9       |
| 12 copies | 14.3 $\pm$ 10.2      |
| 9 copies  | 12.5 $\pm$ 7.7       |
| 6 copies  | 8.15 $\pm$ 4.3       |
| 3 copies  | 2.3 $\pm$ 2.7        |

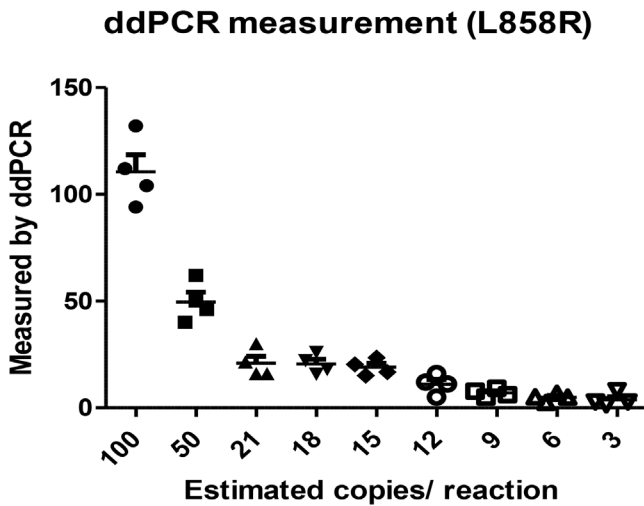

| Estimated  | Measured $\pm$ Stdev |
|------------|----------------------|
| 100 copies | 110.5 $\pm$ 16.1     |
| 50 copies  | 49.5 $\pm$ 9.3       |
| 21 copies  | 20.9 $\pm$ 6.6       |
| 18 copies  | 20.5 $\pm$ 4.5       |
| 15 copies  | 19 $\pm$ 3.8         |
| 12 copies  | 11.1 $\pm$ 4.5       |
| 9 copies   | 7.1 $\pm$ 1.8        |
| 6 copies   | 4.9 $\pm$ 1.7        |
| 3 copies   | 3.8 $\pm$ 2.9        |

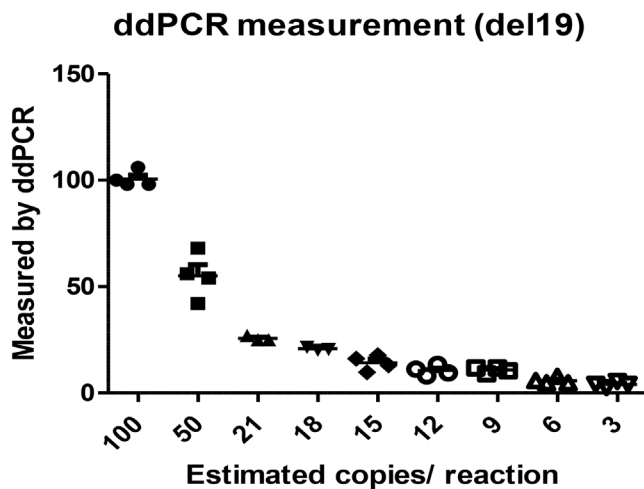

| Estimated  | Measured $\pm$ Stdev |
|------------|----------------------|
| 100 copies | 100.5 $\pm$ 3.8      |
| 50 copies  | 55 $\pm$ 10.6        |
| 21 copies  | 24.65 $\pm$ 2.2      |
| 18 copies  | 17.05 $\pm$ 7.5      |
| 15 copies  | 14.2 $\pm$ 3.5       |
| 12 copies  | 10.5 $\pm$ 2.3       |
| 9 copies   | 10.75 $\pm$ 1.3      |
| 6 copies   | 5.8 $\pm$ 1.4        |
| 3 copies   | 4 $\pm$ 1.1          |

Supplementary Figure 2: Droplet digital PCR measurements used for the spike-in experiments in plasma background.
